# Supplementary material for: Blood-Meal Sources and Trypanosoma cruzi Infection in Coastal and Insular Triatomine Bugs from the Atacama Desert of Chile
Source: MDPI journal article supplement (doi:10.3390/microorganisms10040785), 2022-04-08
Supplement: s1 [file s1]

Figure S1: Graphical workflow that explain the NGS analysis

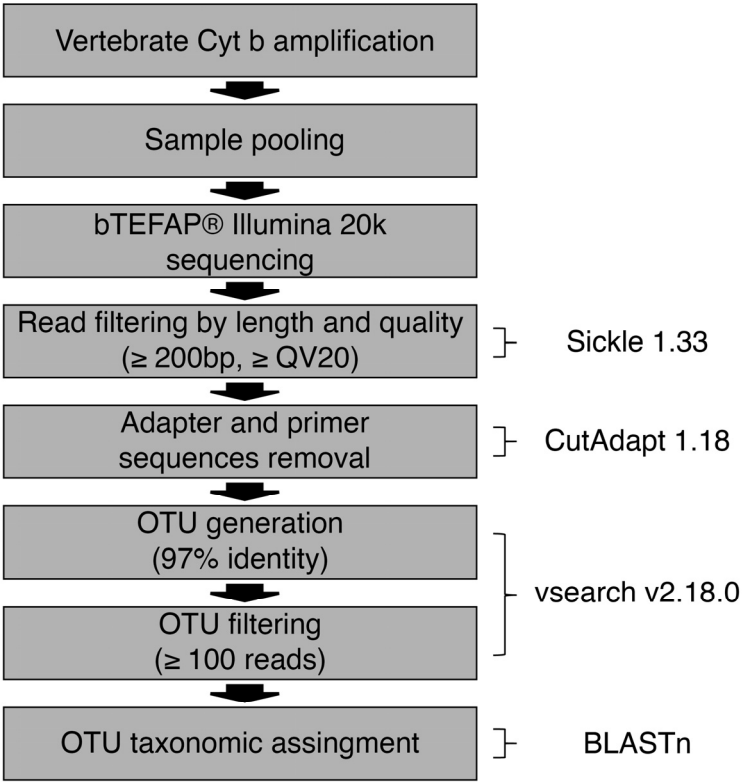

**TABLE S1: Database with the information for *Mepraia parapatrica* individuals captured in the Pan de Azúcar National Park, Atacama Region, Chile.**

**ID:** *Mepraia parapatrica* identification number  
**Sites:** Pan de Azúcar Island (Island) or Pan de Azúcar Mainland (Mainland)  
**Developmental stages:** I-V correspond to 1st - 5th stage nymphs, A/F are adult females  
**Infection Status:** Non-infected (0) or infected with *Trypanosoma cruzi* (1)  
**CytB status:** Without vertebrate CytB (0) or with vertebrate CytB in the digestive tract (1)  
**Sequencing type:** Standard sequencing (SS), Next Generation Sequencing (NGS) for samples with Ct < 34  
**Blood-meal source:** Species identified by standard sequencing of individuals or by NGS in three pooled individuals and one single individual (Ma) *Microlophus atacamensis*, (Ca) *Cathartes aurea*, (Hs) *Homo sapiens*, (Mm) *Mus musculus*, (Ao) *Abrothrix olivaceus*, (Gg) *Garthia gaudichaudii*, (NA) non-identified source

| ID | SITE   | DEVELOPMENTAL STAGE | INFECTION STATUS | CYTB STATUS | SEQUENCING TYPE | BLOOD-MEAL SOURCE |
|----|--------|---------------------|------------------|-------------|-----------------|-------------------|
| 18 | Island | I                   | 0                | 1           | -               | -                 |
| 22 | Island | I                   | 0                | 1           | SS              | Ma                |
| 26 | Island | I                   | 0                | 1           | -               | -                 |
| 27 | Island | I                   | 0                | 0           | -               | -                 |
| 28 | Island | I                   | 0                | 1           | -               | -                 |
| 29 | Island | I                   | 0                | 1           | -               | -                 |
| 35 | Island | I                   | 0                | 1           | SS              | Ca                |
| 36 | Island | I                   | 0                | 1           | -               | -                 |
| 39 | Island | I                   | 0                | 1           | -               | -                 |
| 40 | Island | I                   | 0                | 1           | -               | -                 |
| 43 | Island | I                   | 0                | 1           | SS              | NA                |
| 44 | Island | I                   | 0                | 1           | SS              | Ma                |
| 45 | Island | I                   | 0                | 0           | -               | -                 |
| 46 | Island | I                   | 0                | 1           | -               | -                 |
| 47 | Island | I                   | 0                | 0           | -               | -                 |

|    |        |     |   |   |     |         |
|----|--------|-----|---|---|-----|---------|
| 49 | Island | II  | 0 | 1 | SS  | Hs      |
| 50 | Island | II  | 0 | 1 | SS  | Ma      |
| 51 | Island | II  | 0 | 1 | SS  | Mm      |
| 52 | Island | II  | 0 | 1 | SS  | Mm      |
| 53 | Island | II  | 0 | 1 | SS  | NA      |
| 54 | Island | II  | 0 | 1 | -   | -       |
| 55 | Island | II  | 0 | 1 | -   | -       |
| 56 | Island | II  | 0 | 1 | -   | -       |
| 57 | Island | II  | 0 | 0 | -   | -       |
| 58 | Island | II  | 0 | 1 | SS  | NA      |
| 59 | Island | II  | 0 | 1 | SS  | Ao      |
| 60 | Island | II  | 0 | 1 | SS  | Ao      |
| 61 | Island | III | 0 | 1 | SS  | Hs      |
| 63 | Island | III | 0 | 0 | -   | -       |
| 64 | Island | III | 0 | 1 | -   | -       |
| 65 | Island | III | 0 | 1 | SS  | NA      |
| 66 | Island | III | 0 | 0 | SS  | NA      |
| 69 | Island | V   | 0 | 0 | -   | -       |
| 70 | Island | V   | 0 | 0 | -   | -       |
| 72 | Island | A/F | 0 | 0 | -   | -       |
| 73 | Island | A/F | 0 | 0 | -   | -       |
| 19 | Island | I   | 0 | 1 | NGS |         |
| 31 | Island | I   | 0 | 0 | NGS |         |
| 33 | Island | I   | 0 | 1 | NGS |         |
| 37 | Island | I   | 0 | 1 | NGS |         |
| 42 | Island | I   | 0 | 1 | NGS | pool-Ca |
| 48 | Island | II  | 0 | 1 | NGS |         |
| 62 | Island | III | 0 | 0 | NGS |         |
| 67 | Island | III | 0 | 0 | NGS |         |
| 71 | Island | V   | 0 | 0 | NGS |         |

|     |          |     |   |   |     |         |
|-----|----------|-----|---|---|-----|---------|
| 74  | Island   | A/F | 0 | 1 | NGS |         |
| 17  | Island   | I   | 1 | 1 | SS  | Mm      |
| 16  | Island   | I   | 1 | 1 | NGS |         |
| 20  | Island   | I   | 1 | 1 | NGS |         |
| 21  | Island   | I   | 1 | 0 | NGS |         |
| 23  | Island   | I   | 1 | 0 | NGS |         |
| 24  | Island   | I   | 1 | 1 | NGS |         |
| 25  | Island   | I   | 1 | 0 | NGS | pool-Hs |
| 30  | Island   | I   | 1 | 0 | NGS |         |
| 32  | Island   | I   | 1 | 1 | NGS |         |
| 34  | Island   | I   | 1 | 0 | NGS |         |
| 38  | Island   | I   | 1 | 1 | NGS |         |
| 41  | Island   | I   | 1 | 1 | NGS |         |
| 76  | Mainland | I   | 0 | 0 | -   | -       |
| 77  | Mainland | I   | 0 | 1 | SS  | Ao      |
| 80  | Mainland | I   | 0 | 1 | SS  | Gg      |
| 81  | Mainland | I   | 0 | 0 | -   | -       |
| 85  | Mainland | I   | 0 | 1 | SS  | Ma      |
| 87  | Mainland | I   | 0 | 1 | SS  | Hs      |
| 90  | Mainland | II  | 0 | 1 | SS  | Ma      |
| 94  | Mainland | III | 0 | 1 | SS  | Ma      |
| 95  | Mainland | III | 0 | 1 | SS  | Ma      |
| 96  | Mainland | IV  | 0 | 1 | SS  | Ma      |
| 98  | Mainland | IV  | 0 | 1 | SS  | Hs      |
| 99  | Mainland | IV  | 0 | 1 | SS  | Ma      |
| 100 | Mainland | V   | 0 | 1 | SS  | Ma      |
| 103 | Mainland | V   | 0 | 1 | SS  | Ma      |
| 75  | Mainland | I   | 0 | 1 | NGS |         |
| 78  | Mainland | I   | 0 | 1 | NGS |         |
| 79  | Mainland | I   | 0 | 1 | NGS | pool-Hs |

|     |          |    |   |   |     |    |
|-----|----------|----|---|---|-----|----|
| 84  | Mainland | I  | 0 | 1 | NGS |    |
| 86  | Mainland | I  | 0 | 1 | NGS |    |
| 88  | Mainland | I  | 0 | 1 | NGS |    |
| 82  | Mainland | I  | 1 | 1 | SS  | Ma |
| 89  | Mainland | II | 1 | 1 | SS  | Ma |
| 91  | Mainland | II | 1 | 1 | SS  | Ma |
| 92  | Mainland | II | 1 | 1 | SS  | Ma |
| 93  | Mainland | II | 1 | 1 | SS  | Ma |
| 97  | Mainland | IV | 1 | 1 | SS  | Ma |
| 101 | Mainland | V  | 1 | 1 | SS  | Hs |
| 102 | Mainland | V  | 1 | 1 | SS  | Ma |
| 83  | Mainland | I  | 1 | 1 | NGS | Hs |

**TABLE S2. Detailed sequence assignment of blood meal sources from *Mepraia parapatrica* individuals captured in the Pan de Azúcar National Park, Atacama Region, Chile.**

**ISL:** Insular site  
**MNL:** Mainland site

| SITE | BLOOD MEAL SOURCE              | QUERY COVER | E-VALUE   | PERCENT IDENTITY | SIZE (BP) | ACCESSION NUMBER           |
|------|--------------------------------|-------------|-----------|------------------|-----------|----------------------------|
| ISL  | <i>Microlophus atacamensis</i> | 100%        | 9.00E-171 | 99.70%           | 334       | <a href="#">EF616040.1</a> |
| ISL  | <i>Microlophus atacamensis</i> | 100%        | 9.00E-171 | 99.70%           | 334       | <a href="#">EF616040.1</a> |
| ISL  | <i>Microlophus atacamensis</i> | 100%        | 5.00E-168 | 99.70%           | 329       | <a href="#">EF616040.1</a> |
| MNL  | <i>Microlophus atacamensis</i> | 100%        | 2.00E-167 | 99.70%           | 328       | <a href="#">EF616040.1</a> |
| MNL  | <i>Microlophus atacamensis</i> | 99%         | 5.00E-168 | 99.40%           | 333       | <a href="#">EF616040.1</a> |
| MNL  | <i>Microlophus atacamensis</i> | 100%        | 4.00E-164 | 99.69%           | 322       | <a href="#">EF616040.1</a> |
| MNL  | <i>Microlophus atacamensis</i> | 100%        | 3.00E-165 | 99.69%           | 324       | <a href="#">EF616040.1</a> |
| MNL  | <i>Microlophus atacamensis</i> | 100%        | 1.00E-169 | 99.70%           | 332       | <a href="#">EF616040.1</a> |
| MNL  | <i>Microlophus atacamensis</i> | 100%        | 4.00E-169 | 99.70%           | 331       | <a href="#">EF616040.1</a> |
| MNL  | <i>Microlophus atacamensis</i> | 100%        | 3.00E-165 | 99.69%           | 324       | <a href="#">EF616040.1</a> |
| MNL  | <i>Microlophus atacamensis</i> | 100%        | 2.00E-167 | 99.70%           | 328       | <a href="#">EF616040.1</a> |
| MNL  | <i>Microlophus atacamensis</i> | 100%        | 1.00E-168 | 99.40%           | 333       | <a href="#">EF616040.1</a> |
| MNL  | <i>Microlophus atacamensis</i> | 100%        | 2.00E-167 | 99.70%           | 328       | <a href="#">EF616040.1</a> |
| MNL  | <i>Microlophus atacamensis</i> | 100%        | 2.00E-162 | 99.69%           | 319       | <a href="#">EF616040.1</a> |
| MNL  | <i>Microlophus atacamensis</i> | 100%        | 5.00E-168 | 99.70%           | 329       | <a href="#">EF616040.1</a> |
| MNL  | <i>Microlophus atacamensis</i> | 100%        | 2.00E-167 | 99.70%           | 328       | <a href="#">EF616040.1</a> |
| MNL  | <i>Microlophus atacamensis</i> | 100%        | 7.00E-167 | 99.69%           | 327       | <a href="#">EF616040.1</a> |
| MNL  | <i>Microlophus atacamensis</i> | 100%        | 1.00E-164 | 99.69%           | 323       | <a href="#">EF616040.1</a> |
| ISL  | <i>Homo sapiens</i>            | 100%        | 1.00E-138 | 100              | 274       | <a href="#">OL521838.1</a> |
| ISL  | <i>Homo sapiens</i>            | 100%        | 4.00E-149 | 97.18%           | 319       | <a href="#">MG660548.1</a> |
| MNL  | <i>Homo sapiens</i>            | 98%         | 5.00E-83  | 87.73%           | 279       | <a href="#">KY595576.1</a> |
| MNL  | <i>Homo sapiens</i>            | 100%        | 4.00E-164 | 100%             | 319       | <a href="#">MT242596.1</a> |
| MNL  | <i>Homo sapiens</i>            | 100%        | 4.00E-164 | 99.09%           | 328       | <a href="#">OL521838.1</a> |
| ISL  | <i>Abrothrix olivaceus</i>     | 100%        | 2.00E-161 | 97.91%           | 335       | <a href="#">KF234146.1</a> |

|     |                             |      |           |        |     |                            |
|-----|-----------------------------|------|-----------|--------|-----|----------------------------|
| ISL | <i>Abrothrix olivaceus</i>  | 98%  | 9.00E-161 | 98.48  | 332 | <a href="#">KF234146.1</a> |
| MNL | <i>Abrothrix olivaceus</i>  | 98%  | 9.00E-161 | 98.48% | 332 | <a href="#">KF234146.1</a> |
| ISL | <i>Mus musculus</i>         | 100% | 2.00E-167 | 99.70  | 328 | <a href="#">MN627229.1</a> |
| ISL | <i>Mus musculus</i>         | 98%  | 3.00E-130 | 99.62  | 274 | <a href="#">MN964117.1</a> |
| ISL | <i>Mus musculus</i>         | 100% | 6.00E-122 | 96.67% | 270 | <a href="#">MN964117.1</a> |
| ISL | <i>Cathartes aura</i>       | 100% | 1.00E-158 | 97.60% | 333 | <a href="#">AY509691.1</a> |
| MNL | <i>Garthia gaudichaudii</i> | 95%  | 7.00E-97  | 88.94% | 319 | <a href="#">FJ985047.1</a> |
